# Supplementary material for: Headcase and Unkempt Regulate Tissue Growth and Cell Cycle Progression in Response to Nutrient Restriction
Source: PubMed Central journal article supplement — Cell Rep. Author manuscript; Available in PMC 2019 Jan 29. (PMC6350942; doi:10.1016/j.celrep.2018.12.086), 2019-01-15
Supplement: NIHMS1518826-supplement-1.pdf [file NIHMS1518826-supplement-1.pdf]

**Cell Reports, Volume 26**

**Supplemental Information**

**Headcase and Unkempt Regulate  
Tissue Growth and Cell Cycle Progression  
in Response to Nutrient Restriction**

**Naren Li, Qinfang Liu, Yulan Xiong, and Jianzhong Yu**

# Figure S1

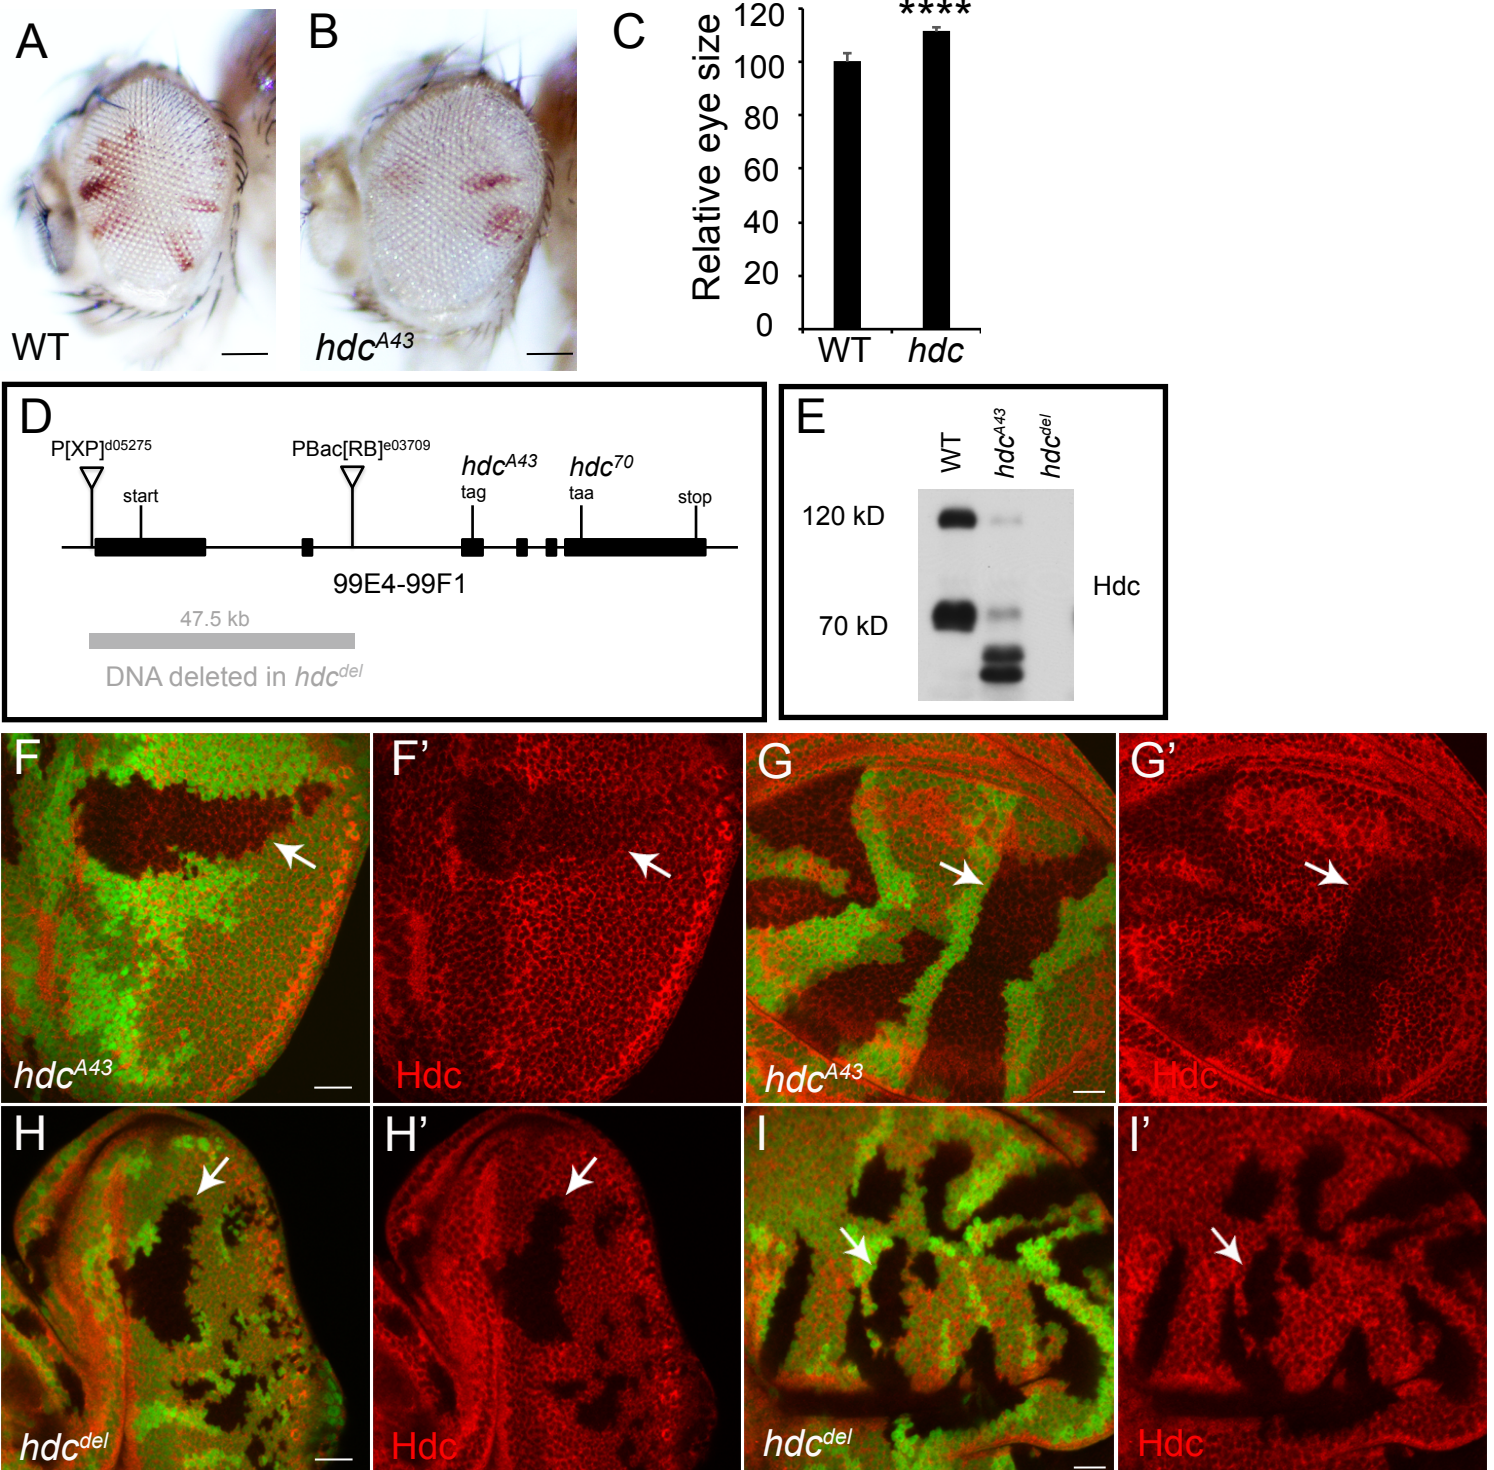

**Figure S1. Isolation and characterization of *hdc* mutant alleles. Related to Figure 1.**

(A-C) Adult eyes comprised predominantly of control cells (A) or *hdc*<sup>A43</sup> cells (B). The genotypes are: *y w ey-flp; FRT 82B/FRT 82B P[w+], L(3)c1-R3* (A) and *y w ey-flp; FRT 82B hdc<sup>A43</sup>/FRT 82B P[w+], L(3)c1-R3* (B). Quantification of relative eye sizes (C). For each analysis (A and B), a total of 10 fly eyes (n=10) were used. The scale bars represent 0.1 mm.

(D) Genomic organization of the *hdc* gene. Also shown is the in frame stop codon (TAA) at *hdc* locus. The nonsense mutation (TAG) of *hdc*<sup>A43</sup> allele and the 47kb genomic DNA deleted from the *hdc*<sup>del</sup> allele are also indicated.

(E) Western blot from the extracts of third instar larvae with following genotypes: wild type (Left lane); *hdc*<sup>A43</sup> / *hdc*<sup>A43</sup> (Middle lane); *hdc*<sup>del</sup> / *hdc*<sup>del</sup> (Right lane).

(F-G') A third instar eye disc (F-F') or wing disc (G-G') containing *hdc*<sup>A43</sup> mutant clones (marked by the absence of GFP), and stained for Hdc protein (red). Note the decreased, but still detectable, Hdc staining (F' and G') in *hdc*<sup>A43</sup> mutant clones (arrows). The scale bars represent 20  $\mu$ m.

(H-I') A third instar eye disc (H-H') or wing disc (I-I') containing *hdc*<sup>del</sup> mutant clones (marked by the absence of GFP), and stained for Hdc protein (red). Note the complete absence of Hdc staining (H' and I') in *hdc*<sup>del</sup> mutant clones (arrows). The scale bars represent 20  $\mu$ m.

Data in (C) are represented as means  $\pm$  SD; \*\*\*\*P<0.0001.

# Figure S2

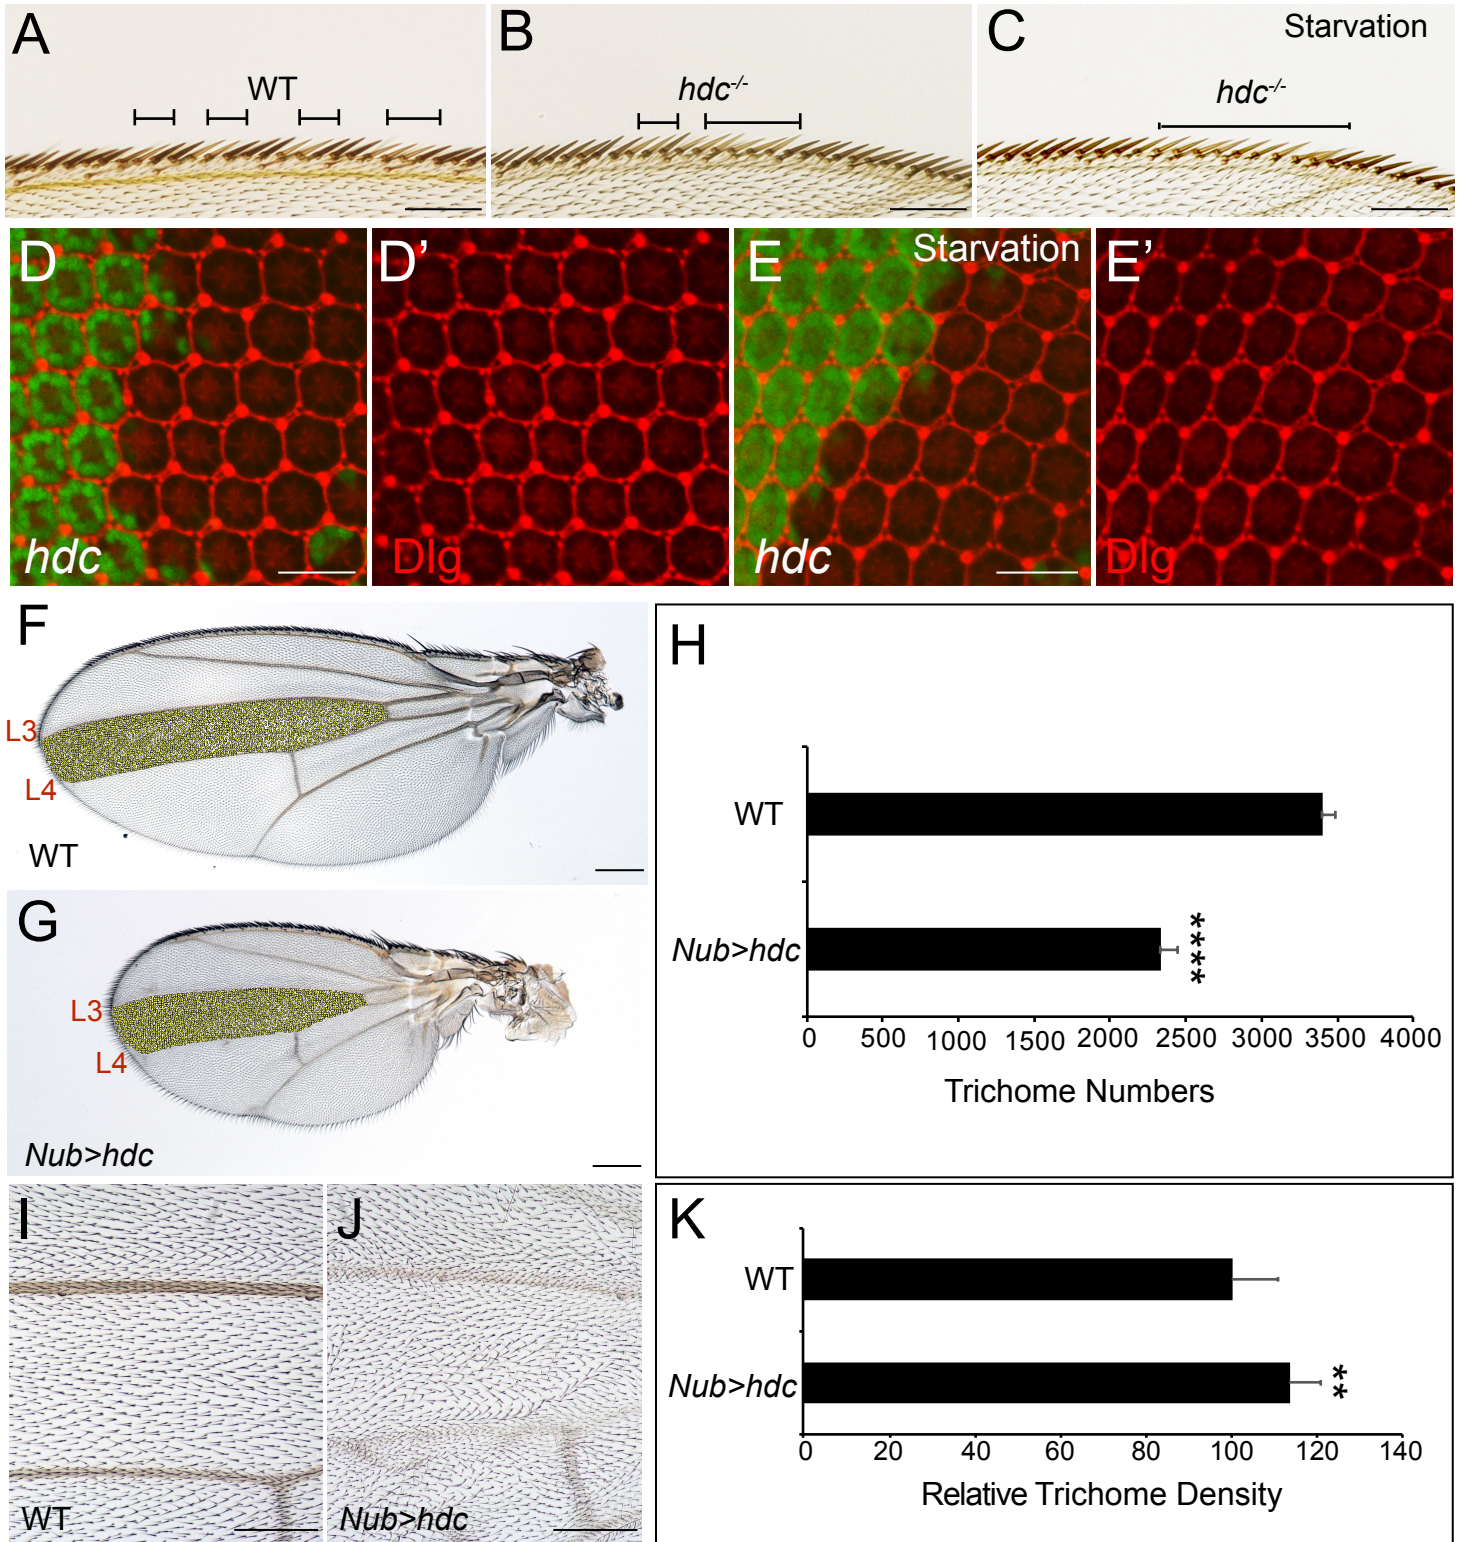

**Figure S2. Hdc regulates cell number. Related to Figure 3.**

(A-C) Adult wing margins containing wild type (A), and *hdc* (B and C) mutant bristles (marked by  $y^+$ , indicated by lines above the wing margins). Note that *hdc* mutant bristles (yellow color) are indistinguishable in cell size from wild-type cells under both nutrient rich (B) and nutrient starvation conditions (C). The scale bars represent 0.1 mm.

(D-E') Mid-pupal retina containing *hdc* mutant clones marked by the lack of GFP, and stained for Discs-Large (red). Note loss of *hdc* does not cause any appreciable effect on cell size under both nutrient rich (D) and nutrient starvation (E) conditions. The scale bars represent 20  $\mu$ m.

(F-H) Trichome numbers between L3 and L4 veins of a control wing (F) and a wing with Hdc overexpression (G) are quantified by Fijiwings (Dobens and Dobens, 2013). For each analysis (F and G), a total of 10 fly wings (n=10) were used. Note reduced trichome number in Hdc overexpression wings (H). The scale bars represent 0.2 mm.

(I-K) Close-up images of a control wing (I) and a wing with Hdc overexpression (J). Trichome densities are quantified (K). For each analysis (I and J), a total of 10 fly wings (n=10) were used. The scale bars represent 0.1 mm.

Data in (H) and (K) are represented as means  $\pm$  SD; \*\*P<0.01, \*\*\*\*P<0.0001.

# Figure S3

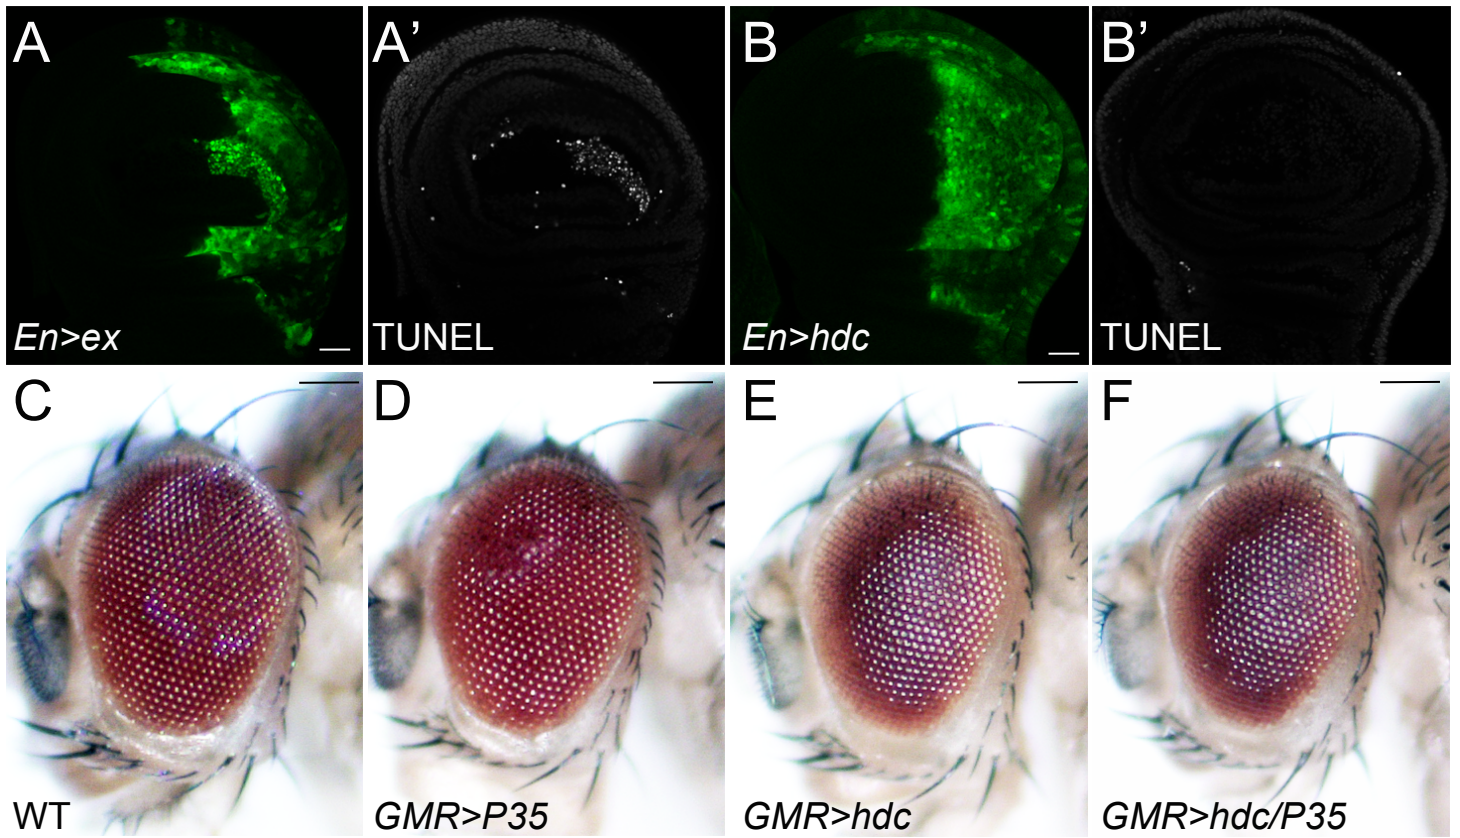

**Figure S3. Hdc does not regulate cell death. Related to Figure 3.**

(A-B) TUNEL staining of third instar wing discs containing *expanded* (A) or *hdc* (B) overexpressing clones (GFP-positive). Note the ectopic cell death in *ex*-overexpressing (A'), but not *hdc*-overexpressing clones (B'). The scale bars represent 20  $\mu$ m.

(C-F) Images of compound eyes from the following genotypes: (C) *GMR-gal4*, (D) *GMR-gal4; UAS-P35*, (E) *GMR-gal4; UAS-hdc*, and (F) *GMR-gal4; UAS-hdc/UAS-P35*. The scale bars represent 0.1 mm

Fig S4

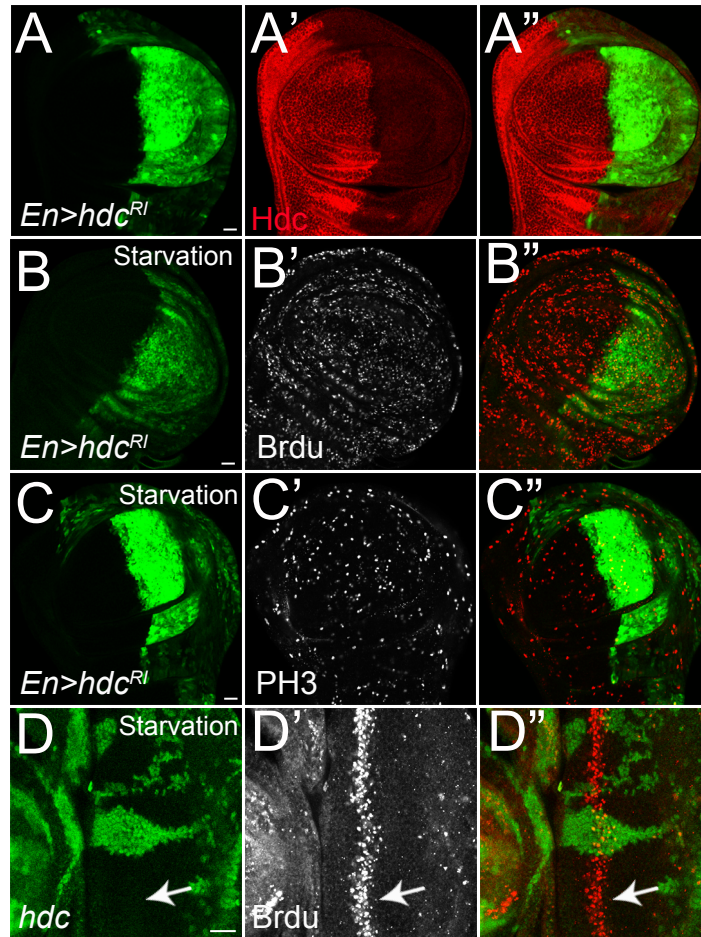



**Figure S4. Hdc regulates cell cycle progression. Related to Figure 3.**

(A-C') Third instar wing discs containing *hdc<sup>RNAi</sup>*-overexpressing clones (GFP-positive) were stained for Hdc (A'), Brdu (B'), and PH3 (C'). Note the mild decreased staining of Brdu in *hdc<sup>RNAi</sup>*-overexpressing clones. The scale bars represent 20  $\mu$ m.

(D-D') A third instar eye disc containing *hdc* mutant clones (GFP-negative) raised under nutrient starvation conditions were stained for Brdu (D'). Note Brdu staining in *hdc* mutant cells are more anterior than wild-type control cells in the SMW (D', arrow). The scale bar represents 20  $\mu$ m.

# Fig S5

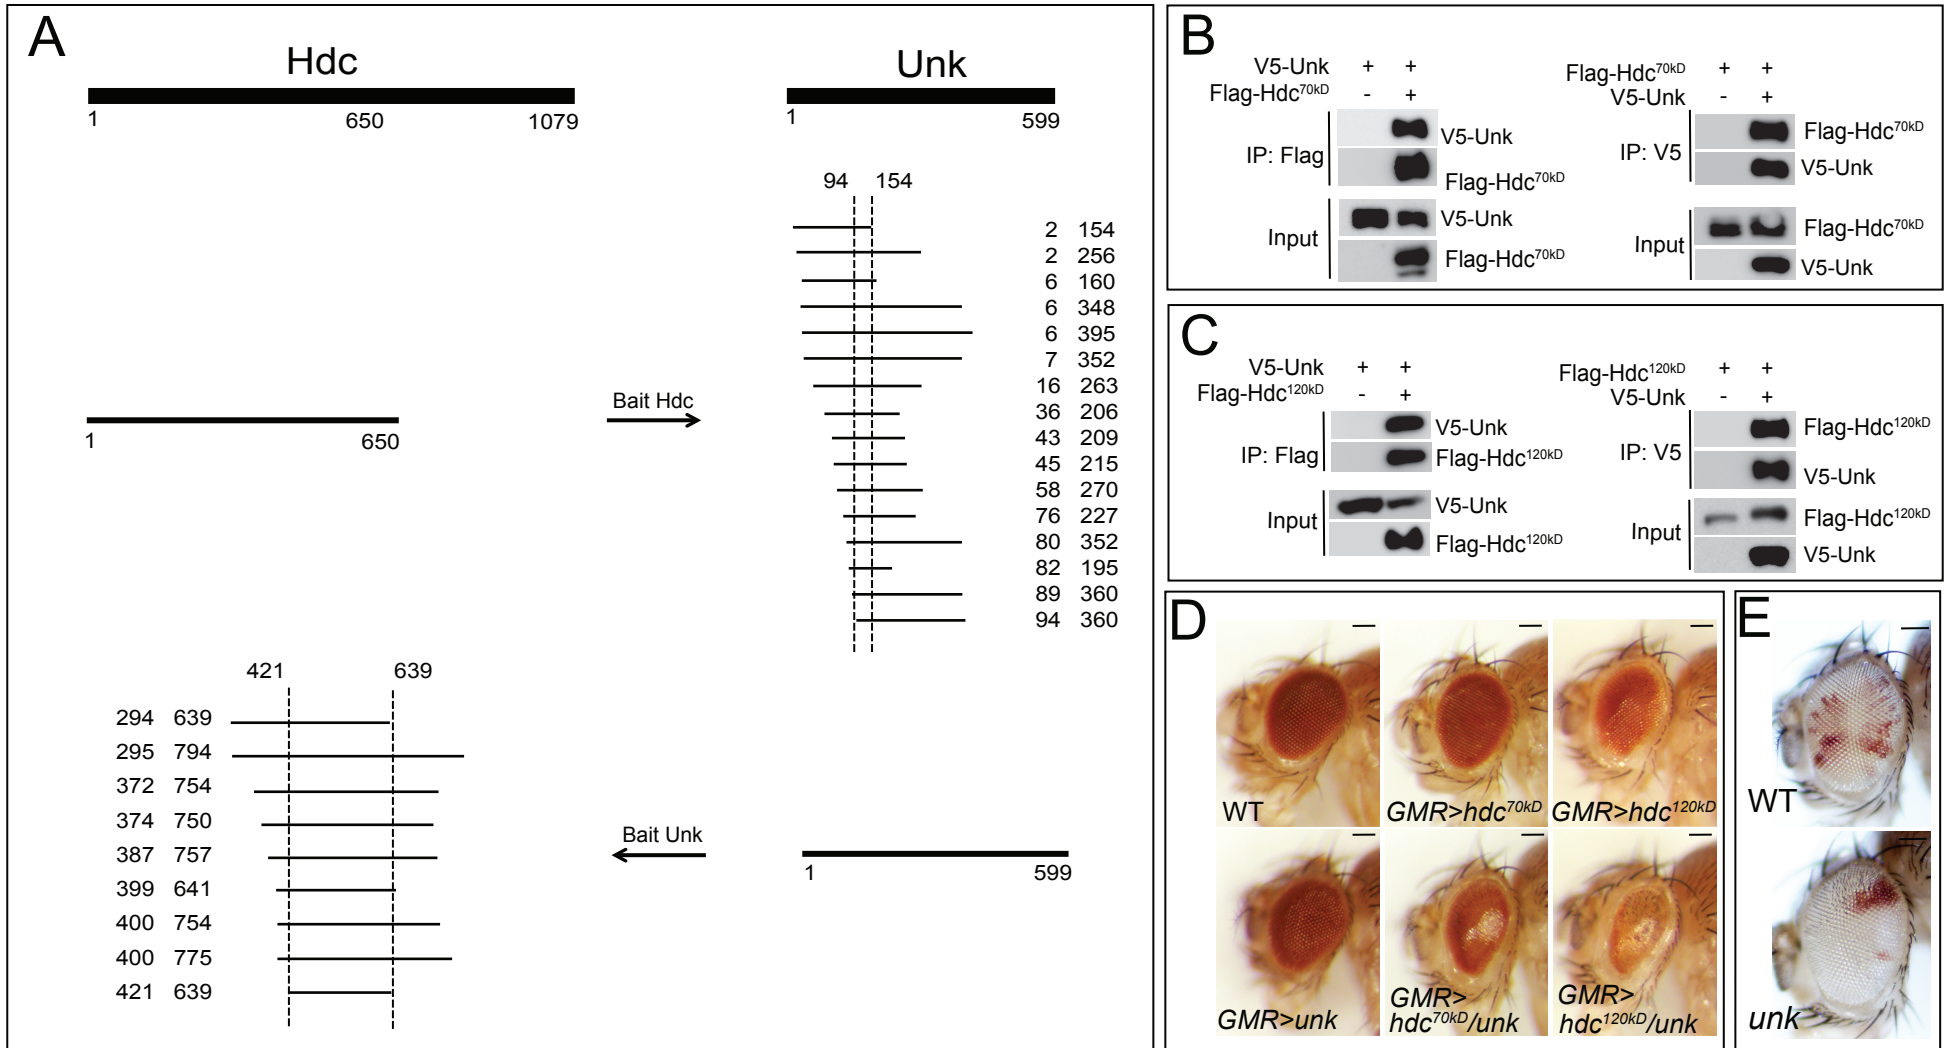

**Figure S5. Hdc interacts with Unk. Related to Figure 4.**

(A) Unbiased yeast two-hybrid screens identify Hdc and Unk as interacting proteins. Schematics of the Bait and the interacting preys from each screen are shown. Also shown are the minimal binding regions based on overlapping prey sequences.

(B-C) Physical association between Unk and Hdc 70kD (B) form or 120kD form (C). Immunoprecipitates of S2 cell lysate expressing the indicated combination of FLAG-Hdc and V5-Unk constructs were probed with the indicated antibodies.

(D) Images of adult eyes from the indicated genotypes. The scale bars represent 0.1 mm.

(E) Adult eyes comprised predominantly of control cells (up) or *unk<sup>ex24</sup>* cells (B). The genotypes are: *y w ey-flp; FRT 82B/FRT 82B P[w+], L(3)c1-R3* (up) and *y w ey-flp; FRT 82B unk<sup>ex24</sup> /FRT 82B P[w+], L(3)c1-R3* (bottom). The scale bars represent 0.1 mm.

# Figure S6

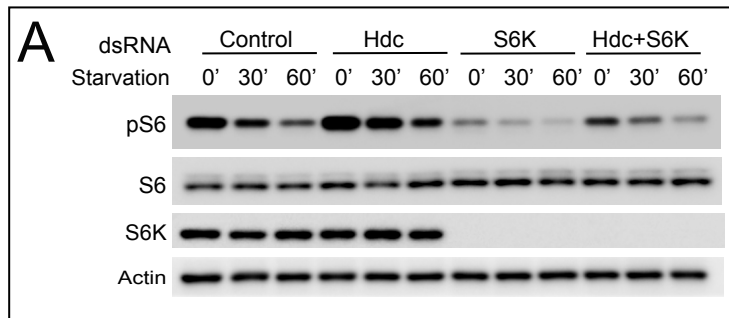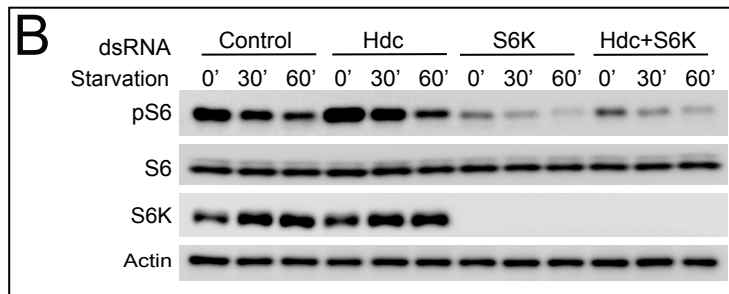

**Figure S6. Hdc and Unk regulate pS6 partially bypass S6K. Related to Figure 5.**

(A-B) S2R+ cells were incubated with dsRNA of GFP, *hdc*, or *unk* in combination with dsRNA of S6K for three days and treated with PBS starvation for indicated time before western blot. Total cell lysates were probed with indicated antibodies. Note that RNAi of *hdc* or *unk* partially rescued S6 phosphorylation decreases caused by S6K RNAi knock-down.

Figure S7

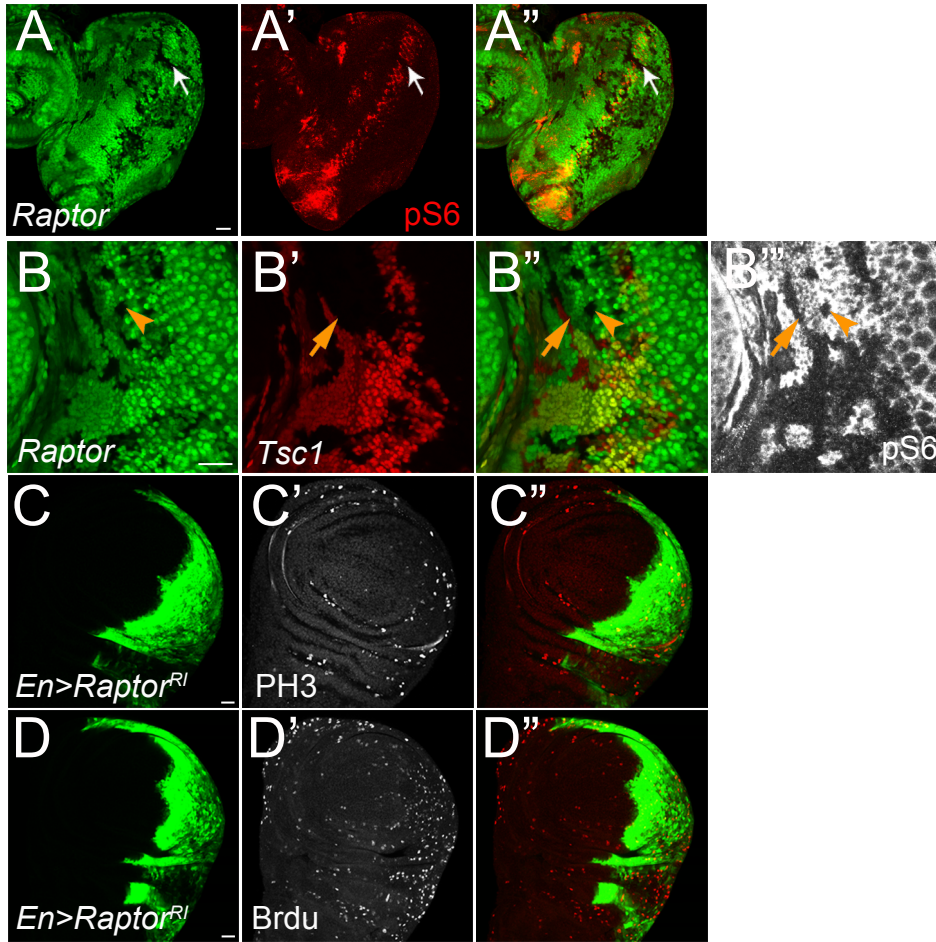

**Figure S7. Raptor regulates pS6 and cell cycle progression. Related to Figure 6.**

(A-A'') A third instar eye disc containing *raptor* mutant clones (A, GFP negative) was stained with pS6 antibody (A', red). Note the pS6 staining is abolished in *raptor* mutant clones (A', arrow). The scale bar represents 20  $\mu\text{m}$ .

(B-B'') Eye discs containing mutant clones of the indicated genotypes were stained with pS6 antibody (white). Mutant clones of *raptor* were marked by loss of GFP, and mutant clones of *tsc1* were marked by loss of RFP. Note the pS6 staining in *tsc1* mutant clones was completely suppressed with loss of *raptor* (arrowheads, black areas in the merged channel). The scale bar represents 20  $\mu\text{m}$ .

(C-D') Third instar wing discs containing *raptor*<sup>RNAi</sup>-overexpressing clones (GFP-positive) were stained for PH3 (C') and Brdu (D'). Note the increased staining of PH3 and Brdu in *raptor*<sup>RNAi</sup>-overexpressing clones. The scale bars represent 20  $\mu\text{m}$ .
